# Supplementary material for: Driving forces behind phase separation of the carboxy-terminal domain of RNA polymerase II
Source: PubMed Central journal article supplement (PMC10519987; doi:10.1038/s41467-023-41633-8), 2023-09-25
Supplement: 41467_2023_41633_MOESM3_ESM.pdf [file 41467_2023_41633_MOESM3_ESM.pdf]

### **Description of Additional Supplementary Files**

**File name:** Supplementary Data 1

**Description:** GROMACS simulation input files as well as the coordinates of the first and last simulation snapshots.
